# Supplementary material for: CpG islands or CpG clusters: how to identify functional GC-rich regions in a genome?
Source: PubMed Central journal article supplement (PMC2652441; doi:10.1186/1471-2105-10-65), 2009-02-20

**Additional file 1** Comparison of the length distribution of CGIs and CGCs

**Figure S1.** Length distribution of CGIs and CGCs. **(A)** Number of CGIs versus CGCs in the human genome. **(B)** Number of CGCs in the promoter regions versus intergenic regions in the human genome. **(C)** Proportion of CGIs versus CGCs in the mouse genome. **(D)** Number of CGIs versus CGCs in the mouse genome. **(E)** Proportion of CGCs in the promoter regions versus intergenic regions in the mouse genome. **(F)** Number of CGCs in the promoter regions versus intergenic regions in the mouse genome.

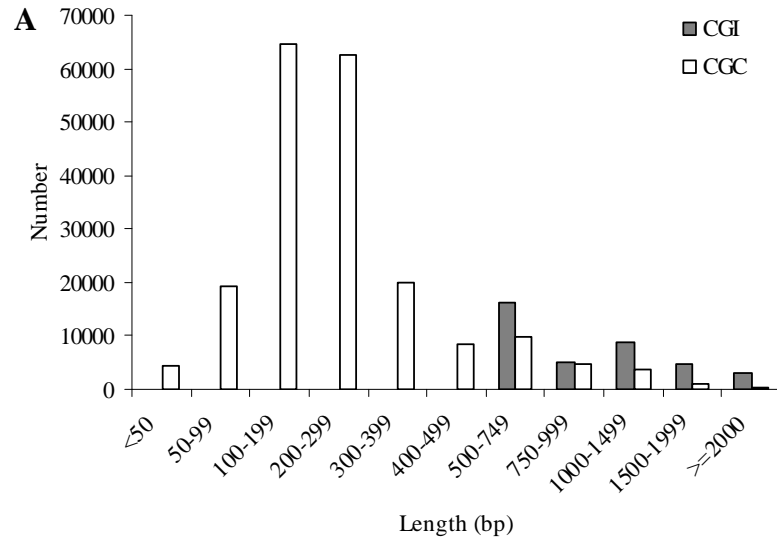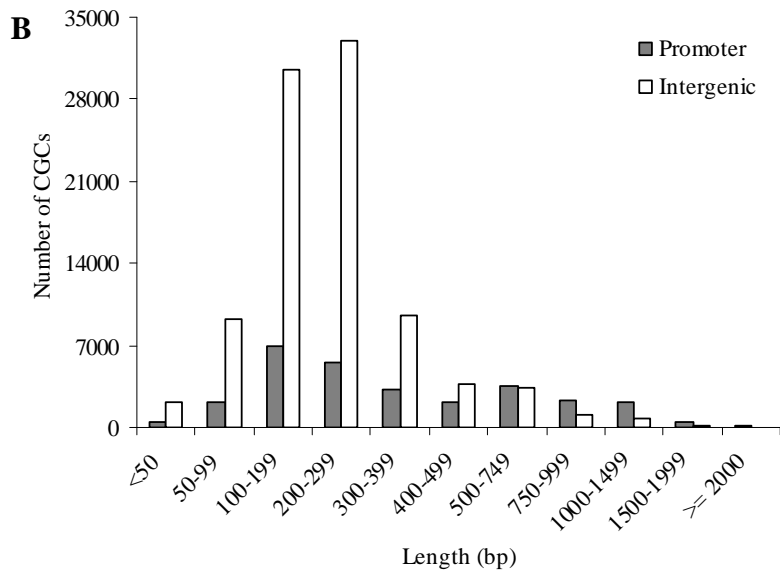

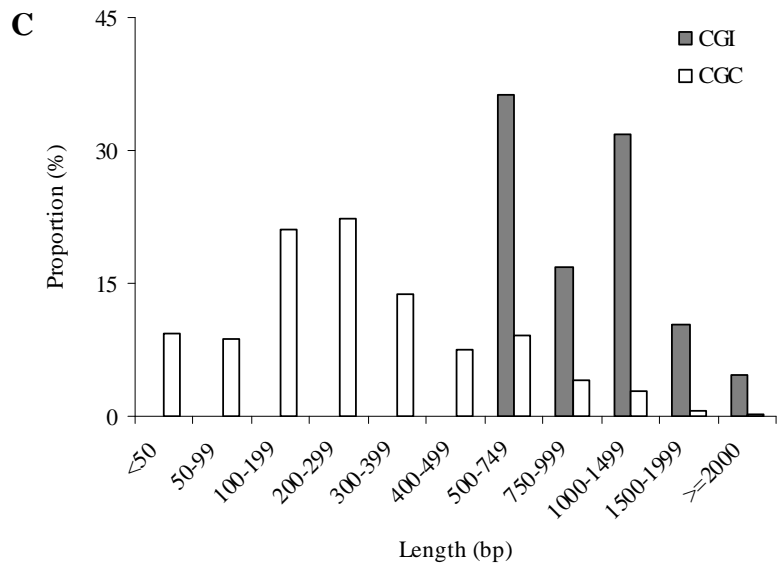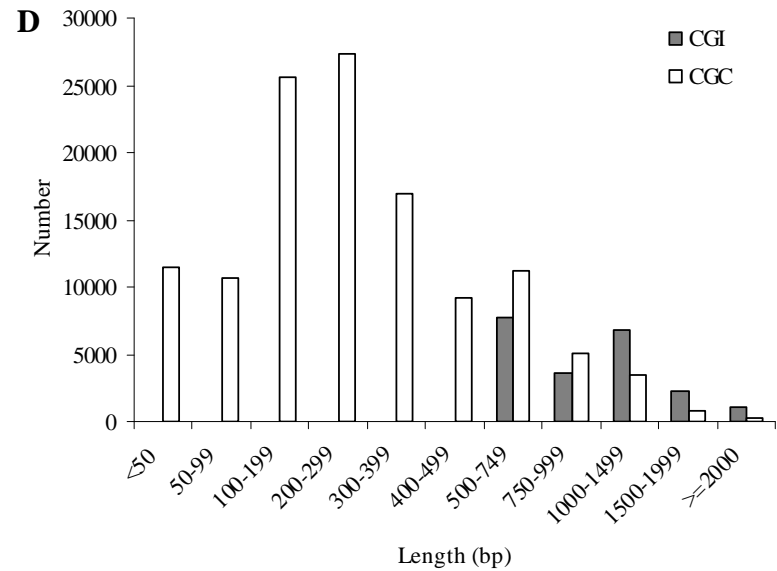

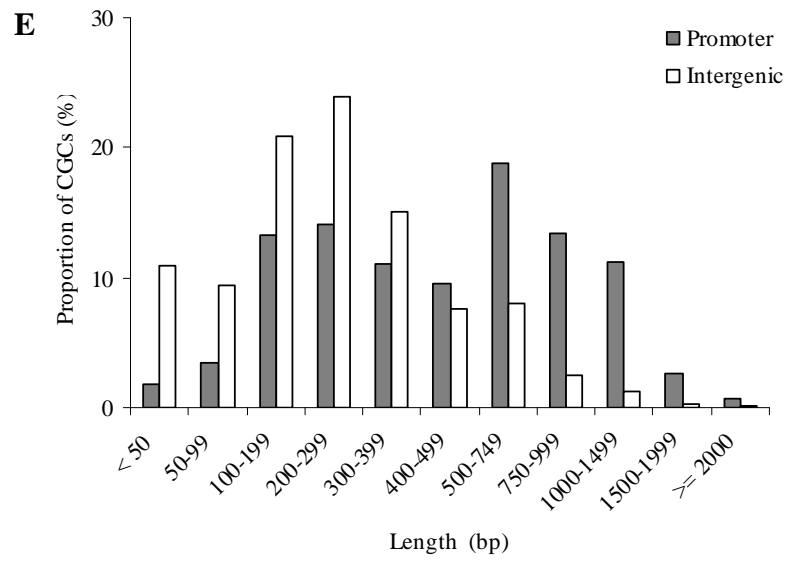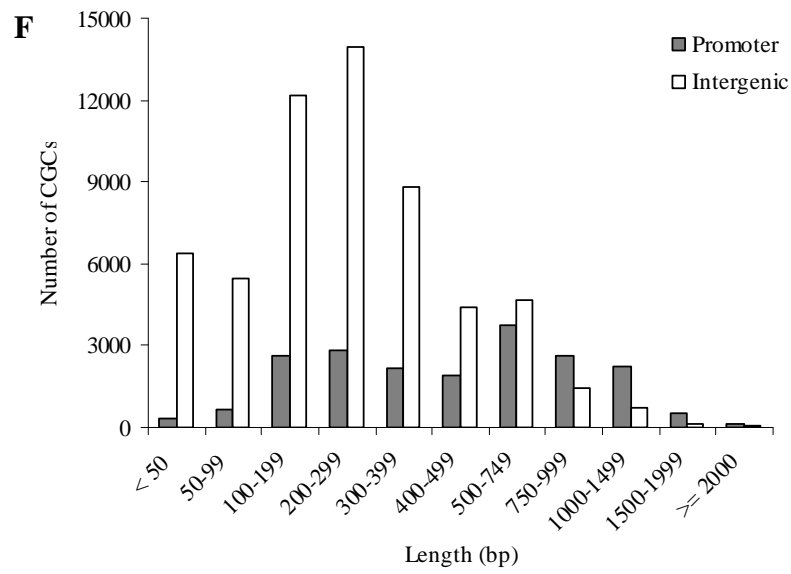

Supplement: 1471-2105-10-65-S1.pdf [file 1471-2105-10-65-S1.pdf]
