# Supplementary material for: CpG islands or CpG clusters: how to identify functional GC-rich regions in a genome?
Source: PubMed Central journal article supplement (PMC2652441; doi:10.1186/1471-2105-10-65), 2009-02-20

**Additional file 2**

**Figure S2.** Distribution of distance between two neighboring CGCs in the promoter region of human-mouse homologous genes.

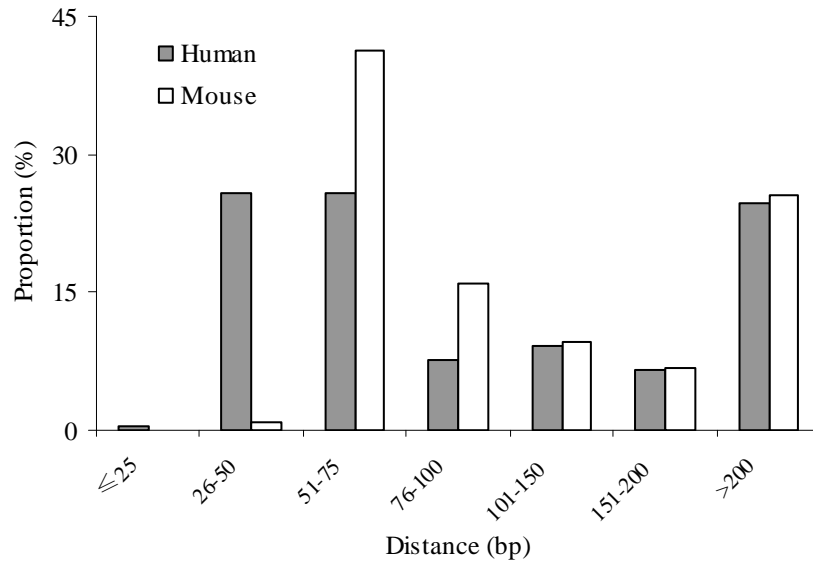

Supplement: 1471-2105-10-65-S2.pdf [file 1471-2105-10-65-S2.pdf]
